1     **Larger and denser: an optimal design for surface grids of EMG**  
2     **electrodes to identify greater and more representative samples of**  
3     **motor units**

4     Arnault H. Caillet<sup>1,2,+</sup>, Simon Avrillon<sup>1,+</sup>, Aritra Kundu<sup>1</sup>, Tianyi Yu<sup>1</sup>, Andrew T.M. Phillips<sup>2</sup>,  
5     Luca Modenese<sup>3</sup>, Dario Farina<sup>1\*</sup>

6             <sup>1</sup>Department of Bioengineering, Imperial College London, SW7 2AZ, UK

7             <sup>2</sup>Department of Civil and Environmental Engineering, Imperial College London, SW7 2AZ, UK

8             <sup>3</sup>Graduate School of Biomedical Engineering, University of New South Wales, Sydney, Australia

9     <sup>+</sup> These authors contributed equally to the study and share the first authorship.

10     \* Corresponding author

11     Prof. Dario Farina

12     Sir Michael Uren Hub

13     Imperial College London

14     86 Wood Ln

15     London W12 0BZ

16     E-mail address: [d.farina@imperial.ac.uk](mailto:d.farina@imperial.ac.uk)

17     ORCID: 0000-0002-7883-2697

18  
19  
20  
21     **Running title:** HD-EMG decomposition with larger and denser grids

22  
23  
24     All the authors in this paper have no financial or other relationships that might lead to a conflict  
25     of interest.

## 26 **Abstract**

27 The spinal motor neurons are the only neural cells whose individual activity can be non-invasively  
28 identified using grids of electromyographic (EMG) electrodes and source separation methods, i.e., EMG  
29 decomposition. In this study, we combined computational and experimental approaches to assess how  
30 the design parameters of grids of electrodes influence the number and characteristics of the motor units  
31 identified. We first computed the percentage of unique motor unit action potentials that could be  
32 theoretically discriminated in a pool of 200 simulated motor units when recorded with grids of various  
33 sizes and interelectrode distances (IED). We then identified motor units from experimental EMG signals  
34 recorded in six participants with grids of various sizes (range: 2-36 cm<sup>2</sup>) and IED (range: 4-16 mm).  
35 Increasing both the density and the number of electrodes, as well as the size of the grids, increased the  
36 number of motor units that the EMG decomposition could theoretically discriminate, i.e., up to 82.5%  
37 of the simulated pool (range: 30.5-82.5%). Experimentally, the configuration with the largest number  
38 of electrodes and the shortest IED maximized the number of motor units identified ( $56 \pm 14$ ; range: 39-  
39 79) and the percentage of low-threshold motor units identified ( $29 \pm 14\%$ ). Finally, we showed with a  
40 prototyped grid of 400 electrodes (IED: 2 mm) that the number of identified motor units plateaus beyond  
41 an IED of 2-4 mm. These results showed that larger and denser surface grids of electrodes help to  
42 identify a larger and more representative pool of motor units than currently reported in experimental  
43 studies.

44

## 45 **Significance statement**

46 Individual motor unit activities can be exactly identified by blind-source separation methods applied to  
47 multi-channel EMG signals recorded by grids of electrodes. The design parameters of grids of EMG  
48 electrodes have never been discussed and are usually arbitrarily fixed, often based on commercial  
49 availability. In this study, we showed that using larger and denser grids of electrodes than conventionally  
50 applied can drastically increase the number of motor units identified. These samples of motor units are  
51 moreover more balanced between high- and low- threshold motor units and provide a more  
52 representative sampling of neural drive to muscles. Gathering large datasets of motor units using large  
53 and dense grids will impact the study of motor control, neuromuscular modelling, and human-machine  
54 interfacing.

55

## 56 **Introduction**

57 Decoding the neural control of natural behaviours relies on the identification of the discharge activity  
58 of individual neural cells. Classically, arrays of electrodes are implanted close to the cells to record their  
59 electrical activity. The application of algorithms that separate the overlapping activity of these cells has  
60 enabled researchers to study neural processes in multiple areas of the brain (Stringer et al., 2019), such  
61 as in the motor or the sensorimotor areas (Churchland and Shenoy, 2007; Gallego et al., 2020). At the  
62 periphery of the nervous system, it is also possible to record the activity of individual motor neurons  
63 innervating muscle fibres (Heckman and Enoka, 2012; Farina et al., 2016; Enoka, 2019). The motor  
64 unit, i.e., a motor neuron and the fibres it innervates, acts as an amplifier of the neural activity, as one  
65 action potential propagating along a motor neuron's axon generates an action potential in each of the  
66 innervated muscle fibres. The activity of motor units can be identified by decomposing surface  
67 electromyographic (EMG) signals into trains of motor unit action potentials (MUAPs) using blind-  
68 source separation algorithms (Holobar and Farina, 2014; Farina and Holobar, 2016). The multiple  
69 observations for source separation are obtained by recording EMG signals with grids of electrodes. This  
70 approach usually allows for the reliable analysis of 5 to 40 concurrently active motor units (Del Vecchio  
71 et al., 2017; Del Vecchio et al., 2020; Hug et al., 2021a).

72 While the design of intracortical (e.g., (Jun et al., 2017; Steinmetz et al., 2018)) and intramuscular (e.g.,  
73 (Muceli et al., 2015; Muceli et al., 2022)) arrays of electrodes has scaled up over the years to record  
74 larger samples of neural cells, the configuration of surface EMG grids of electrodes has not  
75 systematically evolved. Most researchers currently use grids with 64 electrodes arranged in  $13 \times 5$  or  $8$   
76  $\times 8$  montages, the interelectrode distance (IED) between adjacent electrodes (e.g., 4 mm, 8 mm, or 10  
77 mm) being dictated by the size of the muscle to cover. Yet, optimizing these parameters, i.e., grid size  
78 and IED, may influence the performance of EMG decomposition. Currently, there are no  
79 recommendations on optimal design parameters for grids when using surface EMG for the study of  
80 motor units.

81 Source separation algorithms are based on the necessary condition that identifiable motor units have  
82 unique representations across the multi-channel EMG signal (Farina et al., 2008; Holobar and Farina,  
83 2014; Farina and Holobar, 2016). This implies that the three-dimensional waveform of a MUAP (one  
84 time dimension and two spatial dimensions) should be unique within the pool of motor units detected  
85 by the surface grid. In practice, the identified motor units are those that innervate larger numbers of  
86 muscle fibres, as their action potentials tend to have the largest energy. Conversely, low-threshold motor  
87 units usually remain hidden since their energy is close to the baseline noise. Increasing the density of  
88 electrodes would increase the spatial sampling frequencies of the EMG signals (Farina and Holobar,  
89 2016). This should improve the discrimination of MUAPs, allowing the identification of a larger number  
90 of motor units. Additionally, increasing the electrode density may reveal the hidden low-threshold motor

91 units by sampling their action potentials across a larger number of electrodes, leading to a better  
92 compensation of the additive noise in the mixture model of the EMG signal.

93 In this study, we combined computational and laboratory experiments to identify the optimal design  
94 criteria for grids of surface electrodes with the aim of maximizing the number of identified motor units,  
95 specifically increasing the relative number of identifiable low-threshold motor units. We first simulated  
96 a pool of 200 motor units and the associated EMG signals recorded from grids of electrodes of various  
97 sizes and densities. These simulations showed that the greater the size and the density of the grid, the  
98 higher the percentage of identifiable motor units and the relative ratio of identifiable small and deep  
99 units. We confirmed these theoretical results with experimental signals recorded with a grid of 256  
100 electrodes with a 4-mm IED that was downsampled in the space domain to obtain six grid configurations  
101 (surface range: 2-36 cm<sup>2</sup> and IED range: 4-16 mm). Finally, we prototyped a new grid of 400 electrodes  
102 with a 2-mm IED and demonstrated that the number of identified motor units approximately plateaus  
103 beyond a 2-4-mm IED.

## 104 **Methods**

### 105 **Computational study**

106 A pool of 200 motor units was simulated to test whether increasing the density and the size of surface  
107 grids of electrodes would impact the number of identifiable motor units. The simulations were based  
108 on an anatomical model of a cylindrical muscle volume with parallel fibres (Farina et al., 2008;  
109 Konstantin et al., 2020), where subcutaneous and skin layers separate the muscle from the surface  
110 electrodes. Specifically, we set the radius of the muscle to 25.4 mm and the thicknesses of the  
111 subcutaneous and skin layers to 5 mm and 1 mm, respectively. The centres of the motor units were  
112 distributed within the cross section of the muscle using a farthest point sampling. The farthest point  
113 sampling filled the cross-section by iteratively adding centres points that were maximally distant from  
114 all the previously generated motor unit centres, resulting in a random and even distribution of the motor  
115 unit territories within the muscle. The number of fibres innervated by each motor neuron followed an  
116 exponential distribution, ranging from 15 to 1500. The fibres of the same motor unit were positioned  
117 around the centre of the motor unit within a radius of 0.0082 to 0.8 mm, and a density of 20 fibres/mm<sup>2</sup>.  
118 Because motor unit territories were intermingled, the density of fibres in the muscle reached 200  
119 fibres/mm<sup>2</sup>. The MUAPs were detected by circular surface electrodes with a diameter of 1 mm. The  
120 simulated grids were centred over the muscle in the transverse direction, with a size ranging from 14.4  
121 to 36 cm<sup>2</sup>, and an IED ranging from 2 to 36 mm.

122

### 123 **Laboratory study**

#### 124 Participants

125 Six healthy participants (all males; age: 26 ± 4 yr; height: 174 ± 7 cm; body weight: 66 ± 15 kg)  
126 volunteered to participate in the first experimental session of the study. They had no history of lower  
127 limb injury or pain during the months preceding the experiments. One of these individuals (age: 26 yr;  
128 height: 168 cm; bodyweight: 51 kg) participated in a second experimental session to test the prototyped  
129 grid with an IED of 2 mm. The Ethics Committee at Imperial College London reviewed and approved  
130 all procedures and protocols (no. 18IC4685). All participants provided their written informed consent  
131 before the beginning of the experiment.

132

#### 133 Experimental tasks

134 The two experimental sessions consisted of a series of isometric ankle dorsiflexions performed at 30%  
135 and 50% of the maximal voluntary torque (MVC) during which we recorded high density  
136 electromyographical (HD-EMG) signals over the Tibialis Anterior muscle (TA). The participants sat on  
137 a massage table with the hips flexed at 30°, 0° being the hip neutral position, and their knees fully

138 extended. We fixed the foot of the dominant (right in all participants) leg onto the pedal of a commercial  
139 dynamometer (OT Bioelettronica, Turin, Italy) positioned at 30° in the plantarflexion direction, 0° being  
140 the foot perpendicular to the shank. The thigh was fixed to the massage table with an inextensible 3-cm-  
141 wide Velcro strap. The foot was fixed to the pedal with inextensible straps positioned around the  
142 proximal phalanx, metatarsal and cuneiform. Force signals were recorded with a load cell (CCT  
143 Transducer s.a.s, Turin, Italy) connected in-series to the pedal using the same acquisition system as for  
144 the HD-EMG recordings (EMG-Quattrocento; OT Bioelettronica). The dynamometer was positioned  
145 accordingly to the participant's lower limb length and secured to the massage table to avoid any motion  
146 during the contractions.

147 All experiments began with a warm-up, consisting of brief and sustained ankle dorsiflexion performed  
148 at 50% to 80% of the subjective MVC. During the warm-up, all participants learnt to produce isometric  
149 ankle dorsiflexion without co-contracting the other muscles crossing the hip and knee joints. At the same  
150 time, we iteratively adjusted the tightening and the position of the straps to maximize the comfort of the  
151 participant. Then, each participant performed two 3-to-5 s MVC with 120 s of rest in between. The peak  
152 force value was calculated using a 250-ms moving average window, and then used to set the target level  
153 during the submaximal contractions. After 120 s of rest, each participant performed two trapezoidal  
154 contractions at 30% and 50% MVC with 120 s of rest in between, consisting of linear ramps up and  
155 down performed at 5%/s and a plateau maintained for 20 s and 15 s at 30% and 50% MVC, respectively.  
156 The order of the contractions was randomized. One participant (S2) did not perform the contractions at  
157 50% MVC.

158

### 159 High-density electromyography

160 In the first experimental session, four adhesive grids of 64 electrodes (13 x 5; gold coated; 1 mm  
161 diameter; 4 mm IED; OT Bioelettronica) were placed over the belly of the TA. The grids were carefully  
162 positioned side-to-side with a 4-mm-distance between the electrodes at the edges of adjacent grids  
163 (Figure 1A). The 256 electrodes were centred to the muscle belly and laid within the muscle perimeter  
164 identified through palpation. The skin was shaved, abraded and cleansed with 70% ethyl alcohol.  
165 Electrode-to-skin contact was maintained with a bi-adhesive perforated foam layer filled with  
166 conductive paste. The grids were wrapped with tape and elastic bands to secure the contact with the  
167 skin. The four 64-pre-amplifiers were connected in-series with stackable cables to a wet reference band  
168 placed above the medial malleolus of the same leg. HD-EMG signals were recorded in monopolar  
169 derivation with a sampling frequency of 2,048 Hz, amplified (x150), band-pass filtered (10–500 Hz),  
170 and digitised using a 400 channels acquisition system with a 16-bit resolution (EMG-Quattrocento; OT  
171 Bioelettronica).

172 In the second experimental session, one ultra-dense custom-made grid of 400 dry electrodes (20 x 20;  
173 gold coated; 0.5 mm diameter; 2 mm IED) was placed over the belly of the TA. The skin was first shaved  
174 and cleansed with abrasive paste. Then, the electrode was directly placed on the skin after the skin was  
175 wetted to decrease the impedance between the skin and the dry electrodes. The HD-EMG signals were  
176 then recorded in monopolar mode with a sampling frequency of 2,048 Hz, following the same procedure  
177 as before with eight 64-pre-amplifiers connected in-series with stackable cables to a wet reference band  
178 placed above the medial malleolus of the same leg.

#### 179 Grid configurations

180 During the first experimental session, we recorded the myoelectric activity of the TA with a total of 256  
181 electrodes covering 36 cm<sup>2</sup> of the muscle surface (10 cm x 3.6 cm, 4-mm IED, Figure 1A). To investigate  
182 the effect of the electrode density, we downsampled the 256-electrode grid by successively discarding  
183 rows and columns of electrodes and artificially generating three new grids covering the same area with  
184 IEDs 8 mm, 12 mm, and 16 mm, involving 256, 64, 35, and 20 electrodes, respectively (Figure 1B-D).  
185 It is noteworthy that the 8-mm and 16-mm grids covered a surface of 32 cm<sup>2</sup> because they included an  
186 odd number of rows and columns. To investigate the effect of the size of the grid, we discarded the  
187 peripheral electrodes to generate grids of 63, 34 and 19 electrodes with a 4-mm IED, covering 7.7, 3.8  
188 and 2 cm<sup>2</sup> of the muscle (Figure 1E-G). Note that we chose these grid sizes to match the number of  
189 electrodes used in the density analysis, thus comparing grids with similar number of electrodes, but  
190 different densities and sizes (in Figure 1, B versus E, and C versus F).

191 During the second experimental session, we recorded the myoelectric activity of the TA with the ultra-  
192 dense grid of 400 dry electrodes covering 16 cm<sup>2</sup> of the muscle (4 cm x 4 cm, 2-mm IED). Using the  
193 same procedure as above, we generated two artificial grids with an IED of 4 mm and 8 mm, and 100  
194 and 25 electrodes, respectively.



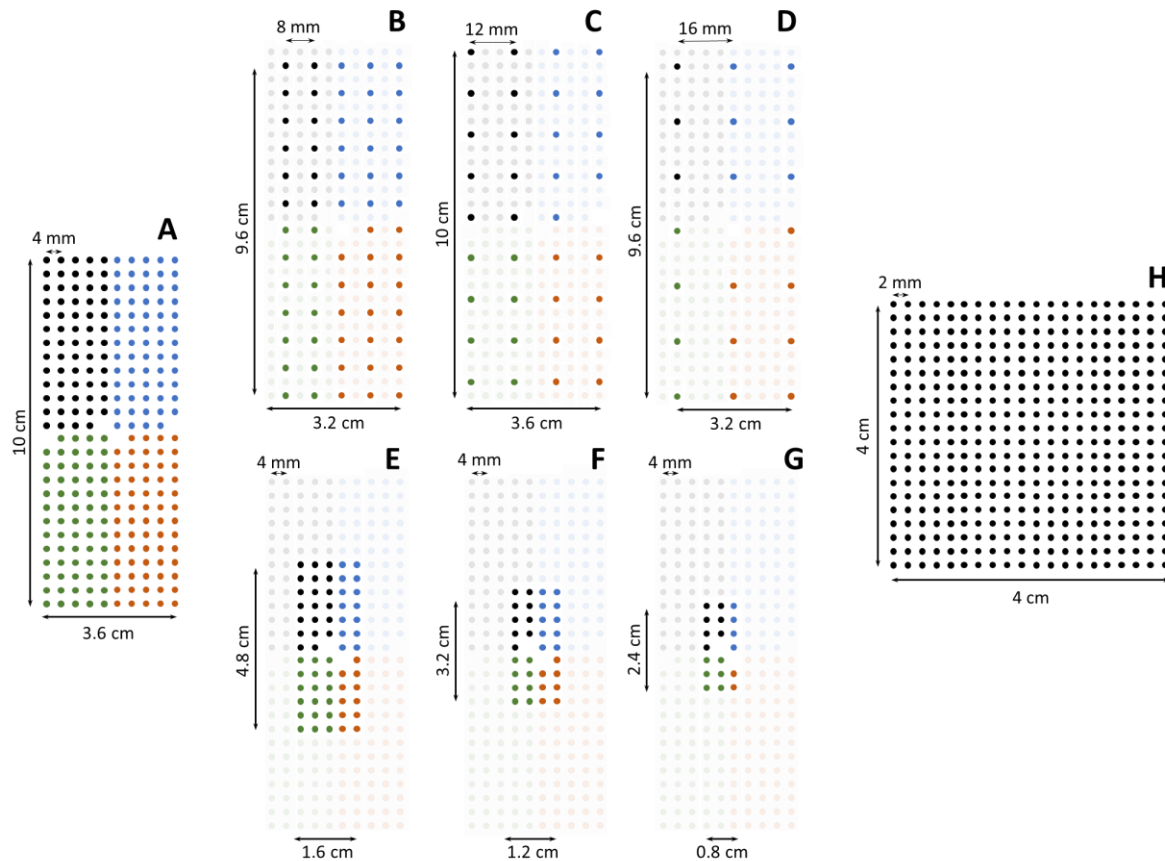

195

196 Figure 1: The eight grid configurations considered in this study. From the grid of 256 electrodes (A, grid  
197 size: 36 cm<sup>2</sup>, IED: 4 mm), six shallower and smaller grids (B-G) were artificially obtained by discarding  
198 the relevant electrodes and used in the first experimental session. (B,C,D) Density analysis: 8, 12, and  
199 16mm IED. (E,F,G) Size analysis: 7.7, 3.6, and 2 cm<sup>2</sup> surface area. (H) The ultra-dense grid of 400 dry  
200 electrodes (grid size: 16 cm<sup>2</sup>, IED: 2 mm) used in the second experimental session.

201

## 202 HD-EMG decomposition

203 We decomposed the signals recorded in all the conditions using the same parameters and procedure.  
204 First, the monopolar EMG signals were bandpass filtered between 20-500 Hz with a second-order  
205 Butterworth filter. After visual inspection, channels with low signal-to-noise ratio or artifacts were  
206 discarded. The HD-EMG signals were then decomposed into motor unit spike trains using convolutive  
207 blind-source separation, as previously described (Negro et al., 2016). In short, the EMG signals were  
208 first extended to reach 1000 channels and spatially whitened. Thereafter, a fixed-point algorithm that  
209 maximized the sparsity was applied to identify the sources embedded in the EMG signals, i.e., the series  
210 of delta functions centred at the motor unit discharge times. These sources are sparse, with most samples  
211 being 0 (i.e., absence of discharge) and a small number of samples being 1 (i.e., discharge times). In this  
212 algorithm, a contrast function was iteratively applied to the EMG signals to estimate the level of sparsity



213 of the identified sources, and the convergence was reached once the level of sparsity did not vary when  
214 compared to the previous iteration, with a tolerance fixed at  $10^{-4}$  (see Negro et al., 2016, for the definition  
215 of the detailed contrast functions). At this stage, the estimated source contained high peaks (i.e., the  
216 delta functions from the identified motor unit) and low peaks from other motor units and noise. High  
217 peaks were separated from low peaks and noise using peak detection and K-mean classification with  
218 two classes. The peaks from the class with the highest centroid were considered as the spikes of the  
219 identified motor unit. A second algorithm refined the estimation of the discharge times by iteratively  
220 recalculating the motor unit filter and repeating the steps with peak detection and K-mean classification  
221 until the coefficient of variation of the inter-spike intervals was minimized. This decomposition  
222 procedure has been previously validated using experimental and simulated signals (Negro et al., 2016).  
223 After the automatic identification of the motor units, duplicates were removed, and all the motor unit  
224 spike trains were visually checked for false positives and false negatives (Del Vecchio et al., 2020). This  
225 manual step is highly reliable across operators (Hug et al., 2021b). Only the motor units which exhibited  
226 a pulse-to-noise ratio (PNR)  $> 28$  dB were retained for further analysis.

227

228 We further tested whether decomposing subsets of electrodes within a highly populated grid of 256  
229 electrodes increased the number of identified motor units. Indeed, the lower ratio of large motor units  
230 sampled by each independent subset of 64 electrodes could allow the algorithm to converge to smaller  
231 motor units that contribute to the signal. For a similar number of iterations, it is likely that these motor  
232 units would have otherwise contributed to the noise component of the mixture model of the EMG signal  
233 (Farina and Holobar, 2016). Thus, we decomposed the four separated grids of 64 electrodes before  
234 removing the motor units duplicated between grids. Similarly, the grid with 400 electrodes was  
235 decomposed as eight separated partially overlapping subsets of 64 electrodes.

236

## 237 **Analysis**

### 238 Computational study

239 We first estimated the theoretical percentage of identifiable motor units for each of the simulated  
240 conditions. To do so, the simulated MUAPs detected over the entire set of electrodes were compared  
241 with each other. The comparisons were done pairwise by first aligning the MUAPs in time using the  
242 cross-correlation function, and then computing the normalised mean square difference between the  
243 aligned action potentials. Pairs of action potentials with a mean square difference below 5% were  
244 considered not discriminable. The 5% criterion was based on the variability of motor unit action  
245 potential shapes observed experimentally for individual motor units (Farina et al., 2008). After  
246 computing all pair-wise comparisons, we then computed the proportion of action potentials that could

247 be discriminated from all others, i.e., the proportion of unique action potentials. This metrics is  
248 independent from the algorithm used for decomposition and establishes an upper bound in the number  
249 of motor units that can be identified by any decomposition algorithm. For each unique action potential,  
250 we also computed the distance between the centre of the territory of the corresponding muscle fibres  
251 and the skin surface.

252

### 253 Laboratory study – number of identified motor units

254 We reported the absolute number of motor units (PNR > 28 dB) identified with all the experimental grid  
255 configurations. For each participant, the number of identified motor units was then normalized to the  
256 maximal number of motor units found across all conditions, yielding normalized numbers of identified  
257 motor units  $\bar{N}$  then expressed in percentage. For each condition, we calculated the mean and standard  
258 deviation of the  $\bar{N}$  values across participants. To investigate the effects of density and size of the grid,  
259 we fitted logarithmic trendlines to the relationships between the averaged  $\bar{N}$  values and IED and grid  
260 size. We also fitted a logarithmic trendline to the average  $\bar{N}$  values and their corresponding number of  
261 electrodes, in which case the conditions involving the same number of electrodes, but different grid size  
262 and density, were given a weight of 0.5 in the minimization function. We reported the  $r^2$  and p-value for  
263 each regression trendline. To maintain consistency with the computational study on the investigation of  
264 the maximum number of identifiable motor units depending on grid design, the trendlines were fitted on  
265 the results obtained when the complete grids of 256 electrodes were decomposed as independent subsets  
266 of 64 electrodes, which systematically returned the highest number of identified motor units. The  
267 trendlines fitted on the results obtained when all available signals were simultaneously decomposed are  
268 reported in Supplementary Material A.

269

### 270 Laboratory study – characteristics of identified motor units

271 To investigate the effects of electrode density and grid size on the characteristics of the motor unit  
272 identified, we used a typical frequency distribution of the motor unit force recruitment thresholds in the  
273 human TA (Caillet et al., 2022a), where  $F^{th}(j)$  is the force recruitment threshold of the  $j^{\text{th}}$  motor unit in  
274 the normalized motor unit pool ranked in ascending order of  $F^{th}$ .

$$275 \quad F^{th}(j) = 0.50 \cdot (58.12 \cdot j + 120j^{1.83}), j \in [0; 1]$$

276 Based on their measured force recruitment threshold, the identified motor units were classified with this  
277 relationship to the first ('low-threshold' or 'small') or second ('high-threshold' or 'large') half of the  
278 active pool, consistent with the Henneman's size principle (Henneman and Mendell, 1981; Caillet et al.,  
279 2022b). For each condition, we reported the percentage of identified motor units classified as 'small'.

280 We did not report this metric when five or fewer motor units were identified in one condition for three  
281 or more participants.

282

283 Laboratory study – correlation between observations

284 We assessed how the density of electrodes impacted the information redundancy in the EMG signals  
285 recorded by adjacent electrodes. To this end, MUAP shapes were identified over the 256 electrodes with  
286 the spike-triggered averaging technique. To do so, the discharge times were used as a trigger to segment  
287 and average the HD-EMG signals over a window of 50 ms. For each motor unit, we identified the  
288 electrode with the highest MUAP peak-to-peak amplitude and calculated the average correlation  
289 coefficient  $\rho$  with the MUAPs recorded by the four adjacent electrodes using an IED of 4 mm, 8 mm,  
290 12 mm, and 16 mm. We also repeated this correlation analysis for the ultra-dense grid of 400 electrodes  
291 using an IED of 2 mm, 4 mm, and 8 mm.

## 292 Results

### 293 Computational study

294 We simulated the firing activity of 200 motor units recorded by 84 configurations of grids of electrodes  
295 (Figure 2; surface range: 14.4 to 36 cm<sup>2</sup>, IED range: 2 to 36 mm). The number of identifiable motor  
296 units increased with the surface size of the grid, from 49.9 ± 6.5% of the motor units identifiable with a  
297 grid of 14.4 cm<sup>2</sup> to 78.7 ± 2.6% of the motor units identifiable with a grid of 36 cm<sup>2</sup>. The number of  
298 identifiable motor units also increased with a decrease in interelectrode distance. For example, with a  
299 grid of 36 cm<sup>2</sup>, the number of identifiable motor units increased from 72% to 82.5% of the motor units  
300 with an IED of 36 and 2 mm, respectively (Figure 2B). Increasing the surface size and the density of the  
301 grid of electrodes revealed smaller and deeper motor units, with averaged territories radius of 0.165 and  
302 0.149 mm with grids of 14.4 and 36 cm<sup>2</sup>, respectively, and an IED of 2 mm (Figure 2C). The average  
303 distance of identifiable motor units from the skin increased with the surface size of the grid (Figure 2D;  
304 15.7 ± 0.1 mm vs. 17.3 ± 0.1 mm with grids of 14.4 and 36 mm<sup>2</sup>, respectively), but not with the IED of  
305 the grids (Figure 2D; 16.4 ± 0.6 mm vs. 16.3 ± 0.8 mm with an IED of 36 and 2 mm, respectively).

306

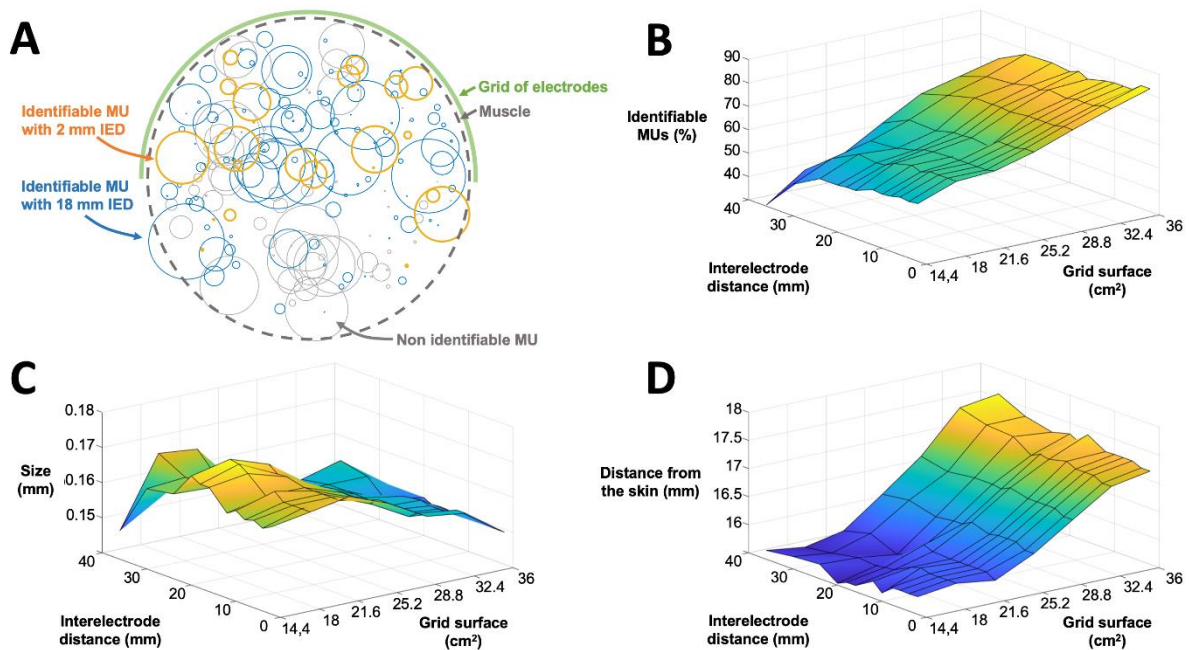

307

308 Figure 2: Results from the 200 simulated motor units with 84 configurations of grids of electrodes. (A)  
309 Each circle represents a motor unit territory, the dash line being the muscle boundary. Blue circles are the  
310 identifiable motor units with a grid of 21.6 cm<sup>2</sup> and an interelectrode distance (IED) of 18 mm, while the  
311 orange circles are the motor units revealed with a grid of 21.6 cm<sup>2</sup> and an IED of 2mm. Grey circles  
312 represent the non-identifiable motor units. The percentage of identifiable motor units (B), the size of their  
313 territory (C) and their distance from the skin (D) are reported for the 84 configurations.

314

315

316 **Laboratory study - grids of 256 electrodes**

317 Number of identified motor units

318 The motor unit spike trains identified across all conditions, intensities, and participants were visually  
319 checked and carefully edited when a missing spike or an identified artifact were observed. The highest  
320 number of identified motor units was systematically reached with the separate decomposition of the four  
321 grids of 64 electrodes with an IED of 4 mm, resulting in  $56 \pm 14$  motor units ( $\text{PNR} = 34.2 \pm 1.1$ ) and  $45$   
322  $\pm 10$  motor units ( $\text{PNR} = 34.0 \pm 0.9$ ) for 30% and 50% MVC, respectively (Figure 3). At least 82% of  
323 the motor units identified in one condition were also identified in the conditions involving a higher  
324 number of electrodes. Similarly, 91% to 100% of the motor units identified in one condition were also  
325 identified with the 256-electrode configuration (4-mm IED, 36-cm<sup>2</sup> size, Figure 1A) when the four grids  
326 were decomposed separately.

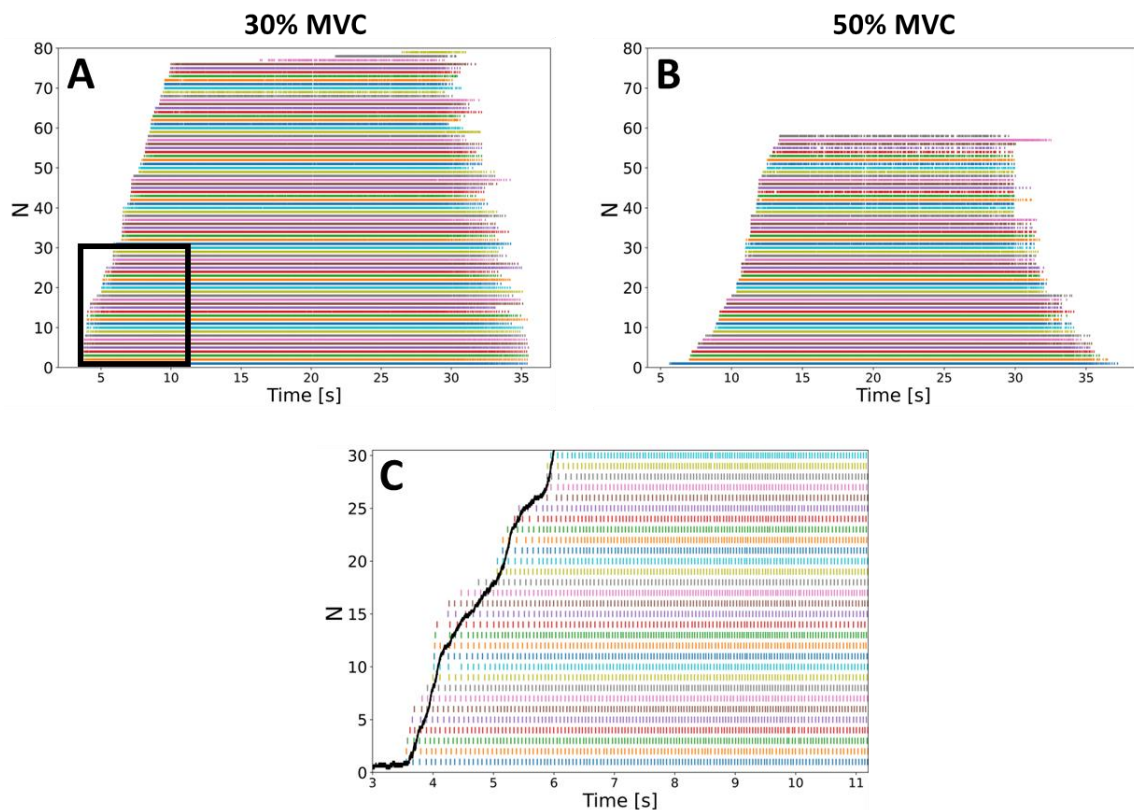

327

328 Figure 3: Maximum numbers of motor unit spike trains identified in one participant (S1) at 30% (A) and  
329 50% MVC (B), 79 and 58 motor units ( $\text{PNR} > 28$  dB) respectively, obtained when the four grids of 64  
330 electrodes (4 mm IED) were decomposed separately. (C) The pulse trains of the 30 motor units of lowest  
331 recruitment threshold identified at 30% MVC (black box in A) are reproduced during the ascending ramp  
332 of force (black curve).

333

334 When considering the effect of electrode density (grid size fixed at 32-36 cm<sup>2</sup>, Figure 1A-D), we found  
335 the lowest number  $N$  of motor units with the 16-mm IED, identifying  $3 \pm 1$  motor units and  $2 \pm 1$  motor

336 units at 30% and 50% MVC, respectively (Figure 4A, C). Additional motor units were then gradually  
337 identified with greater electrode densities. The highest number of motor units was observed with the  
338 highest density (4-mm IED), respectively identifying  $56 \pm 14$  or  $43 \pm 11$  motor units and  $45 \pm 10$  or  $25$   
339  $\pm 6$  motor units at 30% and 50% MVC, and this with the  $4 \times 64$  or 256-electrode decomposition procedure  
340 (Figure 4A, C). Finally, we found a decreasing logarithmic relationship between the average normalized  
341 number  $\bar{N}$  of motor units for each participant and the IED, with  $r^2 = 1.0$  ( $p = 2.5 \cdot 10^{-5}$ ) and  $r^2 = 0.99$  ( $p =$   
342  $0.001$ ) at 30% and 50% MVC, respectively (Figure 4B, D).

343 When considering the effect of the size of the grid (IED fixed at 4 mm, Figure 1A, E-G), we found the  
344 lowest number  $N$  of motor units with a grid of  $2 \text{ cm}^2$ , identifying  $4 \pm 2$  motor units and  $4 \pm 2$  motor units  
345 at 30% and 50% MVC, respectively (Figure 5A, C). Additional motor units were then gradually  
346 identified with larger grid sizes. The highest number of motor units was observed with a grid of  $36 \text{ cm}^2$ ,  
347 respectively identifying  $56 \pm 14$  or  $43 \pm 11$  motor units and  $45 \pm 10$  or  $25 \pm 6$  motor units at 30% and  
348 50% MVC, depending on the decomposition procedure (Figure 5A, C). We also found an increasing  
349 logarithmic relationship between the average normalized number  $\bar{N}$  of motor units for each participant  
350 and the size of the grid, with  $r^2 = 0.99$  ( $p = 3.0 \cdot 10^{-4}$ ) and  $r^2 = 0.98$  ( $p = 0.001$ ) at 30% and 50% MVC,  
351 respectively (Figure 5B, D). It is noteworthy that, in both density and size cases, the parameters of the  
352 fits were very similar for 30% and 50% MVC.

353 As both the density and the size of the grids determine the number of electrodes, we finally fitted the  
354 relationship between the normalized number of motor units  $\bar{N}$  and the number of electrodes. As observed  
355 previously, more motor units were identified with a larger number of electrodes, following a logarithmic  
356 tendency with  $r^2 = 0.98$  ( $p = 0.018$ ) and  $r^2 = 0.95$  ( $p = 0.016$ ) at 30% and 50% MVC, respectively (Figure  
357 6). A plateau should theoretically be reached with highly populated grids of 1024 and 4096 electrodes  
358 ( $36\text{-cm}^2$  grids with 2-mm and 1-mm IED, respectively), with a prediction of 50% and 90% of additional  
359 motor units identified.

360 For a fixed number of electrodes, it is noteworthy that grid size and density, although linked, may have  
361 different impact on the number of identified motor units (black crosses in Figure 6). For example, 1.25  
362 times more motor units were obtained with the 64-electrode condition ( $32 \text{ cm}^2$ , 8-mm IED, Figure 1B)  
363 than with the 63-electrode condition ( $7.7 \text{ cm}^2$ , 4-mm IED, Figure 1E) for the group of participants at  
364 30% MVC.



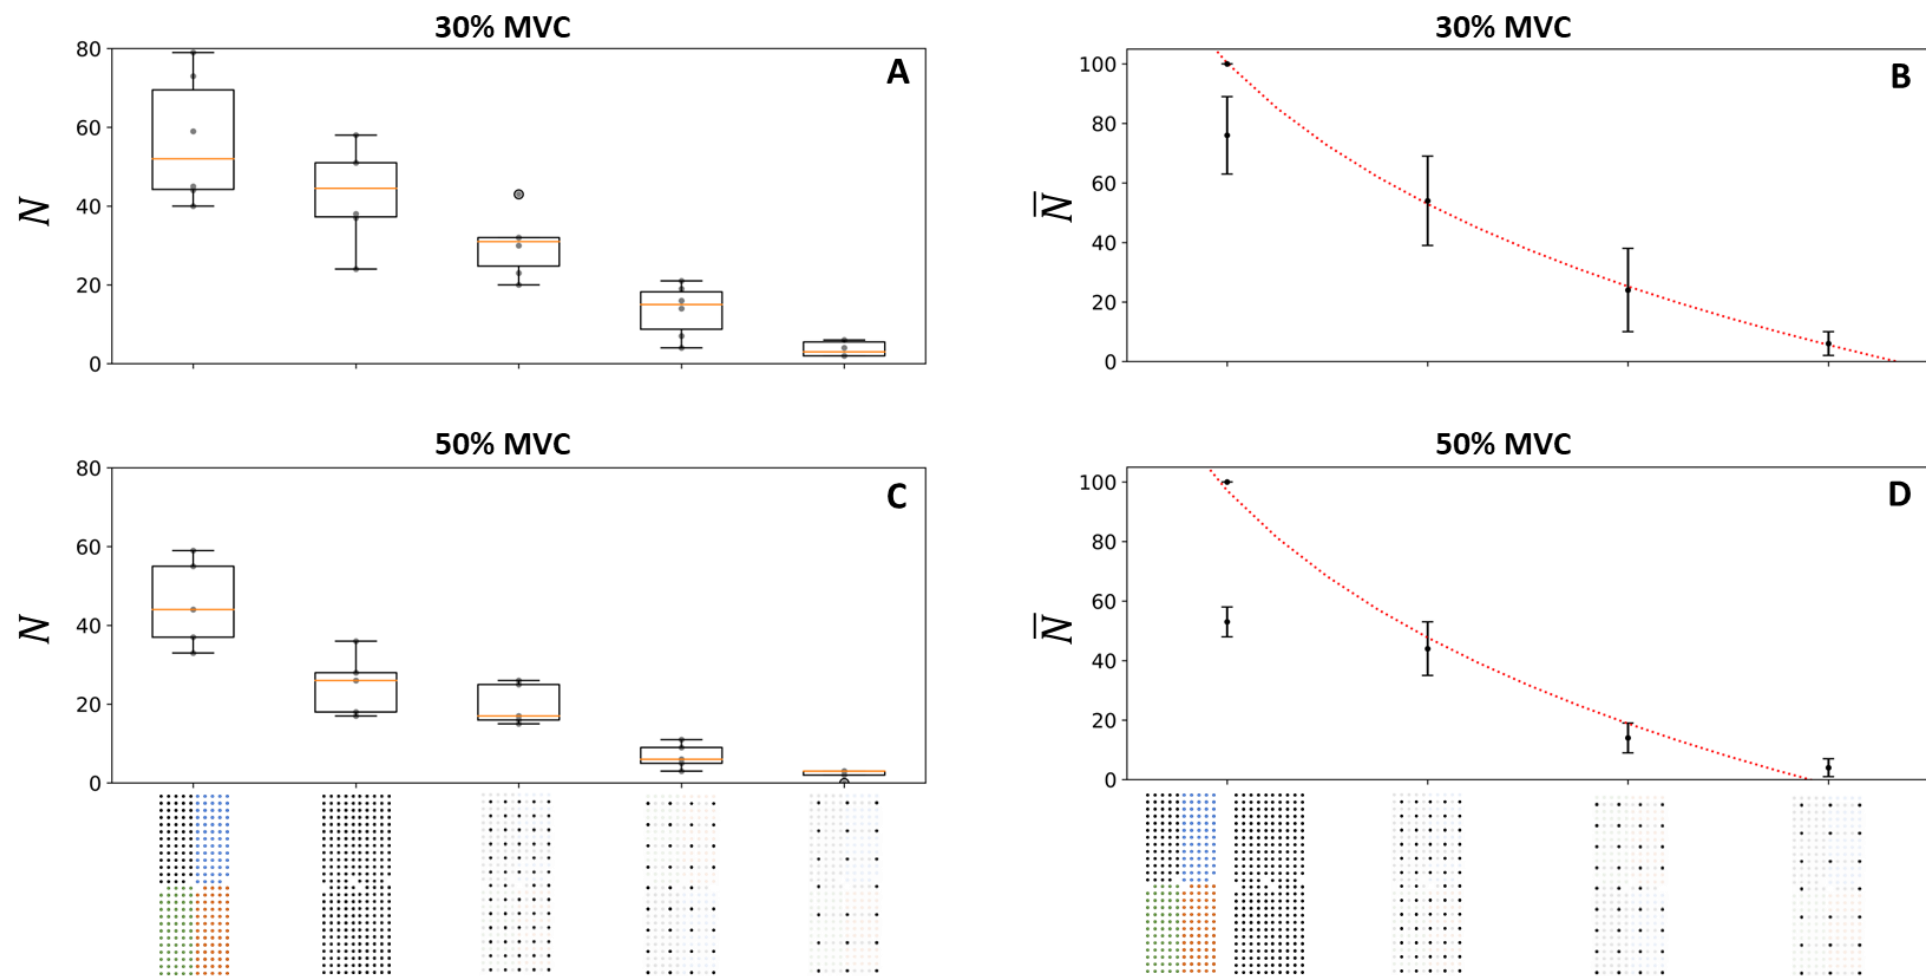

367 Figure 4: Effect of the electrode density on the number  $N$  of identified motor units at 30% (A, B) and 50% MVC (C, D). The boxplots in the left column report the absolute number  $N$   
 368 of identified motor units per participant (grey dots) and the median (orange line), quartiles, and 95%-range across participants. In the right column, the normalized number of motor  
 369 units  $\bar{N}$  logarithmically decreases with interelectrode distance  $d$  (4, 8, 12, and 16mm in abscissa) as  $\bar{N} = 195 - 68 \log(d)$  ( $r^2 = 1.0, p = 2.5 \cdot 10^{-5}$ ) at 30% MVC (B) and  $\bar{N} =$   
 370  $196 - 71 \log(d)$  ( $r^2 = 0.99, p = 0.001$ ) at 50% MVC (D). The standard deviation of  $\bar{N}$  across subjects is displayed with vertical bars. Two decomposition procedures were  
 371 considered for the 256-electrode condition; the grid of 256 black electrodes indicates that the 256 signals were simultaneously decomposed and systematically returned lower  $\bar{N}$   
 372 results than when the grid was decomposed as four subsets of 64 electrodes. To maintain consistency with the computational study, the trendlines were here fitted with the 4\*64  
 373 condition that returned the higher number of identified motor units (see Supplementary Material A for the other fitting condition).



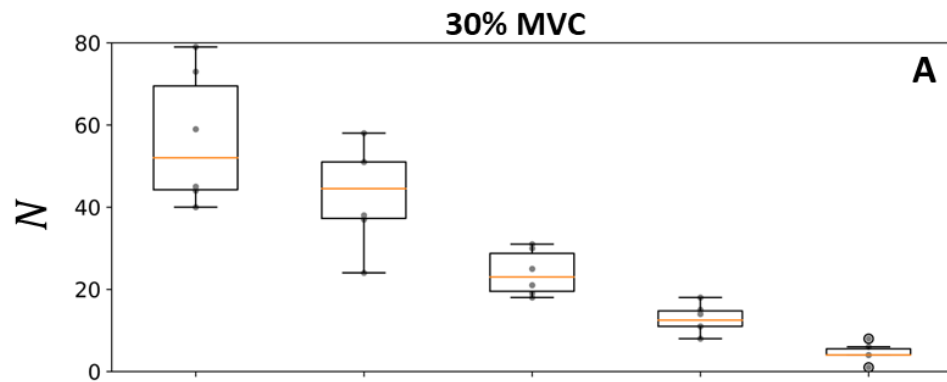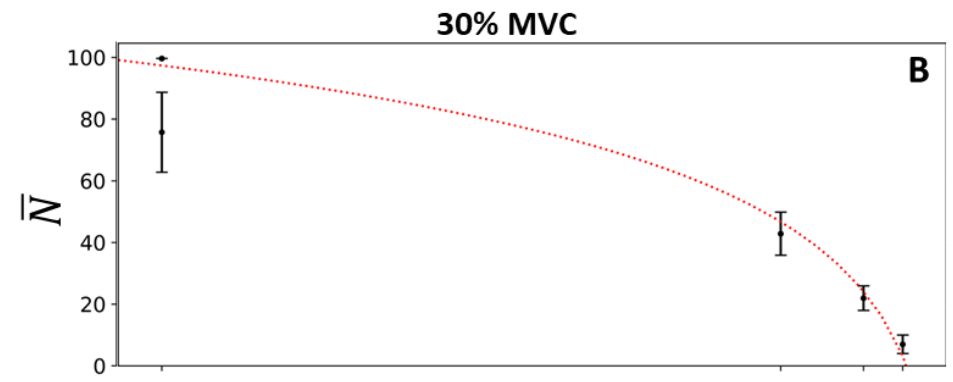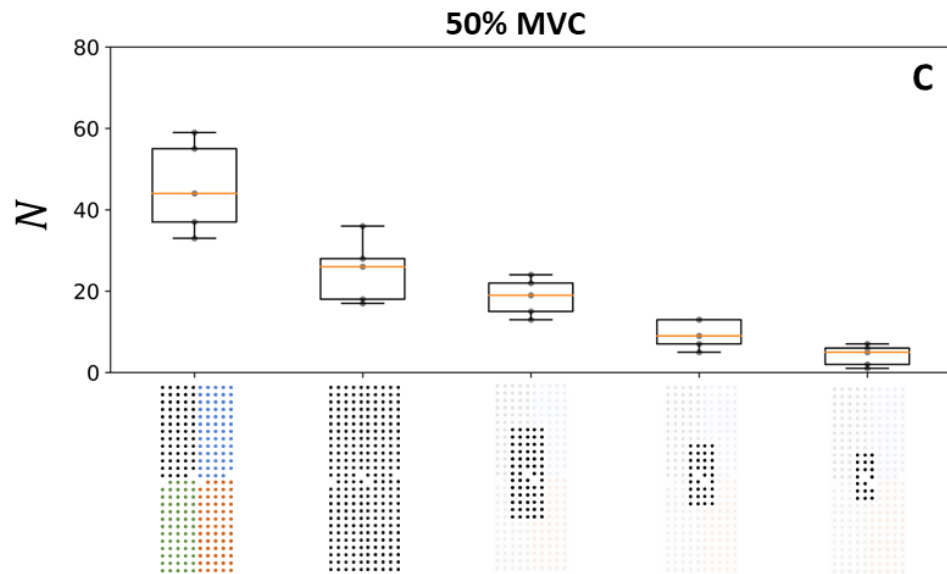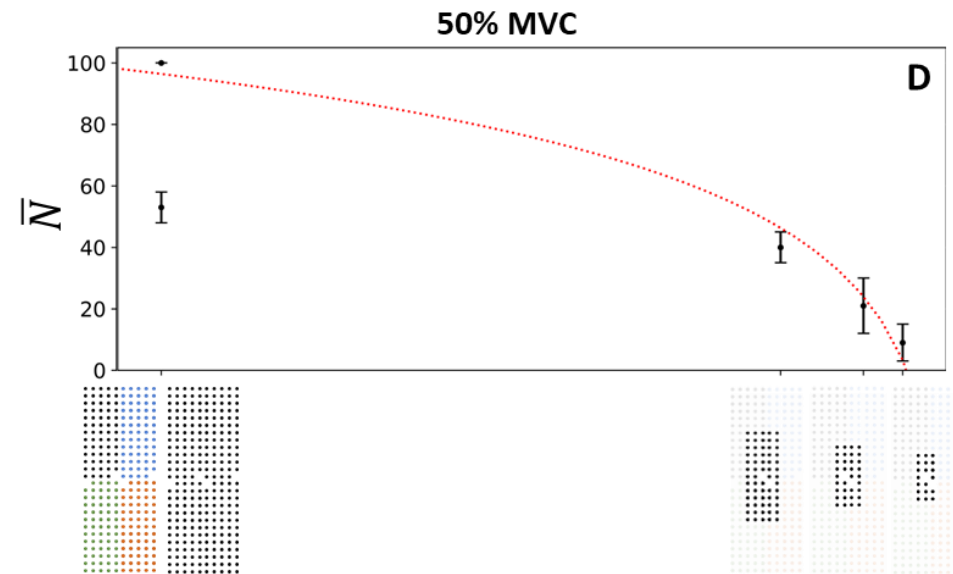

374

375 Figure 5: Effect of the size of the grid on the number  $N$  of identified motor units at 30% (A, B) and 50% MVC (C, D). The boxplots in the left column report the absolute number  $N$  of  
 376 identified motor units per participant (grey dots) and the median (orange line), quartiles, and 95%-range across participants. In the right column, the normalized number of motor units  
 377  $\bar{N}$  logarithmically decreases with the size of the grid  $s$  (2, 3.8, 7.7, and 36 cm<sup>2</sup> in abscissa) as  $\bar{N} = -20 + 33 \log(s)$  ( $r^2 = 0.99, p = 3.0 \cdot 10^{-4}$ ) at 30% MVC (B), and  $\bar{N} = -19 +$   
 378  $32 \log(s)$  ( $r^2 = 0.98, p = 0.001$ ) at 50% MVC (D). The standard deviation of  $\bar{N}$  across subjects is displayed with vertical bars. Two decomposition procedures were considered for  
 379 the 256-electrode condition; the grid of 256 black electrodes indicates that the 256 signals were simultaneously decomposed and systematically returned lower  $\bar{N}$  results than when the  
 380 grid was decomposed as four subsets of 64 electrodes. To maintain consistency with the computational study, the trendlines were here fitted with the 4\*64 condition that returned the  
 381 higher number of identified motor units (see Supplementary Material A for the other fitting condition).

382

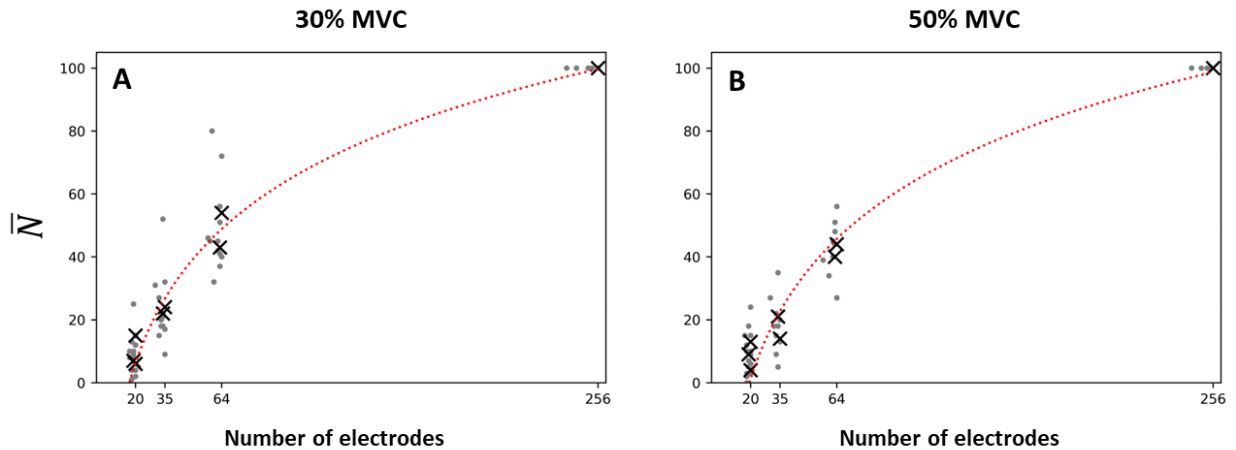

383

384 Figure 6: Effect of the number  $n$  of electrodes on the normalized number  $\bar{N}$  of identified motor units at  
385 30% (A) and 50% MVC (B). The discrete results per participant are displayed with grey data points. The  
386 average  $\bar{N}$  values across participants per condition are displayed with black crosses. Weighted logarithmic  
387 trendlines were fitted to the data and returned (A)  $\bar{N} = -104 + 37 \log(n)$  ( $r^2 = 0.98, p = 0.018$ ), and  
388 (B)  $\bar{N} = -113 + 38 \log(n)$  ( $r^2 = 0.95, p = 0.016$ ). Two decomposition procedures were considered for  
389 the 256-electrode condition; the grid of 256 black electrodes indicates that the 256 signals were  
390 simultaneously decomposed and systematically returned lower  $\bar{N}$  results than when the grid was  
391 decomposed as four subsets of 64 electrodes. To maintain consistency with the computational study, the  
392 trendlines were here fitted with the 4\*64 condition that returned the higher number of identified motor units  
393 (see Supplementary Material A for the other fitting condition).

#### 394 Characteristics of identified motor units

395 Figure 7A shows the effect of the grid density on the type (small/large) of identified motor units at 30%  
396 MVC, with a percentage of identified ‘small’ motor units increasing from  $11 \pm 9\%$ , with a 12-mm IED,  
397 to  $29 \pm 14\%$ , with a 4-mm IED. Such differences were not observed at 50% MVC, where the percentage  
398 of ‘small’ motor units remained below 10% for all conditions (Figure 7C). Contrary to the density, the  
399 size of the grid did not impact the distribution of the type of identified motor units, with the percentage  
400 of ‘small’ motor units ranging from 20 to 29% across all grid sizes (Figure 7B). Again, small motor  
401 units represented less than 10% of the identified motor units at 50% MVC for all the size conditions  
402 (Figure 7D).

403 To support the above observations made at 30% MVC, grids involving the same number of electrodes  
404 but of different grid density and size were directly compared. 62% of the motor units identified with the  
405 64-electrode ( $32 \text{ cm}^2$ , IED 8 mm) and 63-electrode ( $7.7 \text{ cm}^2$ , IED 4 mm) conditions were identified by  
406 both grids at 30%.  $28 \pm 9\%$  of the remaining motor units specific to the 8-mm IED grid were ‘small’,  
407 while  $44 \pm 11\%$  of the motor units specific to the 4-mm IED condition were ‘small’. Similar results were  
408 obtained with the 35- ( $36 \text{ cm}^2$ , 12-mm IED) and 34-electrode conditions ( $3.6 \text{ cm}^2$ , 4-mm IED), where  
409 more ‘small’ motor units were specifically identified with denser rather than larger grids.

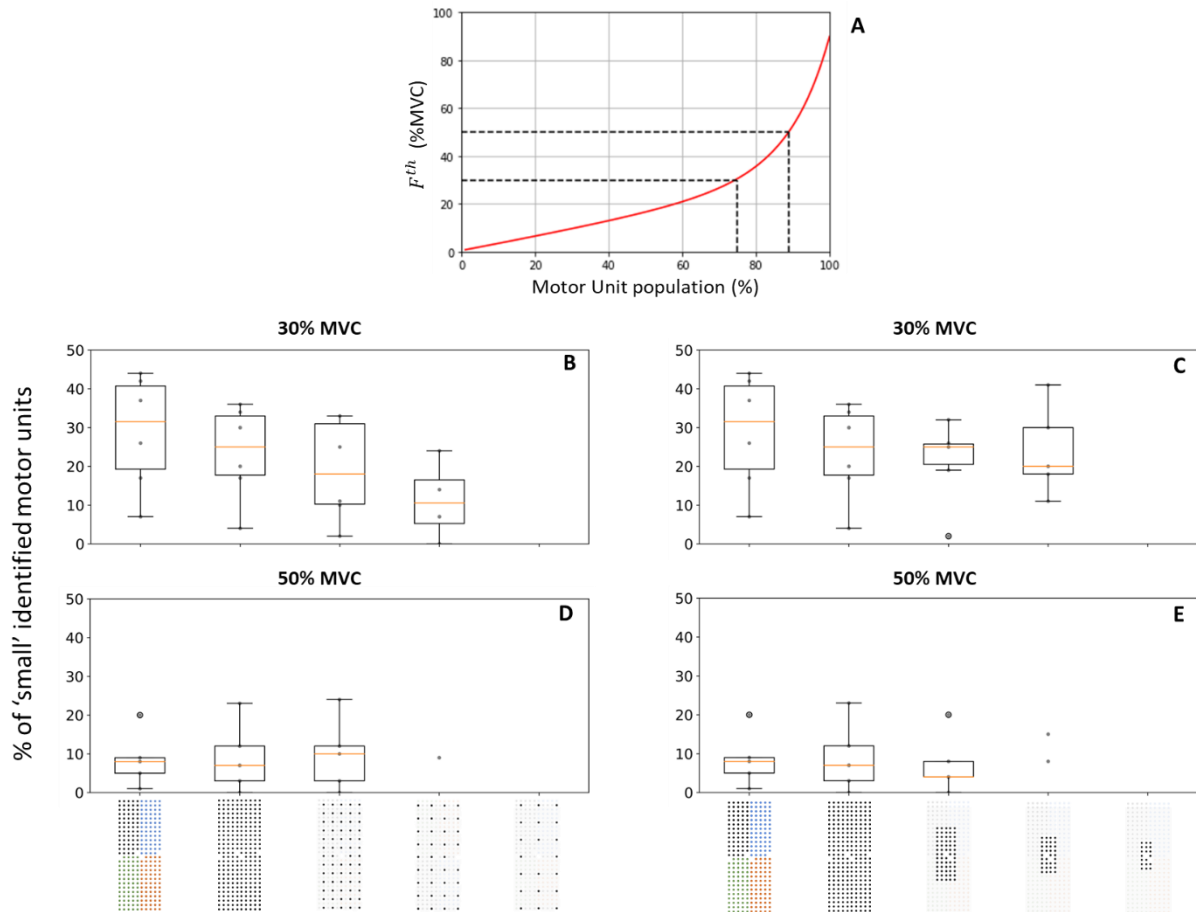

410

411 Figure 7: (A) Typical frequency distribution of motor unit force recruitment thresholds in a human TA  
412 motor unit pool ranked in ascending order of force recruitment thresholds according to the Methods. The  
413 black dashed lines identify the theoretical portions of the population recruited at 30% and 50% MVC.  
414 Effect of the grid density (B, D) and grid size (C, E) on the percentage of 'small' motor units identified at  
415 30% (B, C) and 50% MVC (D, E). The boxplots report the results per participant (grey dots) and the  
416 median (orange line), quartiles, and 95%-range across participants.

417

#### 418 Correlation between MUAPs from adjacent electrodes

419 Figure 8 reports the effect of electrode density on the level of MUAP correlation  $\rho$  between adjacent  
420 electrodes for the six participants. The lowest average correlation coefficient  $\rho$  calculated between the  
421 MUAP with the highest peak to peak amplitude and the MUAPs identified over adjacent electrodes was  
422 observed with an IED of 16 mm ( $\rho = 0.87 \pm 0.03$  and  $\rho = 0.88 \pm 0.04$  at 30% and 50% MVC,  
423 respectively). The level of correlation increased with reduced IED (Figure 8B, C), with  $\rho = 0.96 \pm 0.04$   
424 and  $\rho = 0.95 \pm 0.05$  between the MUAPs from adjacent electrodes with a 4-mm IED at 30% and 50%  
425 MVC, respectively.

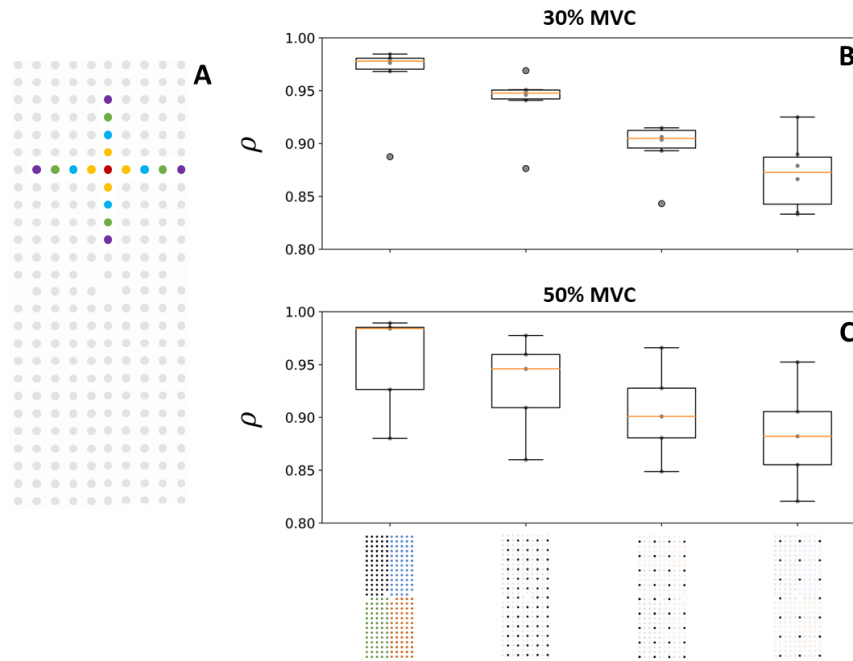

426

427 Figure 8: Effect of the electrode density on the MUAP correlation  $\rho$  between adjacent electrodes (A) at  
428 30% (B) and 50% MVC (C). The MUAP shape identified over the red electrode was compared to those  
429 identified over the four adjacent electrodes located at 4 (orange), 8 (blue), 12 (green) and 16 (purple) mm  
430 IED (A). The boxplots report the correlation coefficient  $\rho$  per participant (grey dots) and the median  
431 (orange line), quartiles, and 95%-range across participants.  
432

432

### 433 Laboratory study with an ultra-dense grid of 400 electrodes

434 Maximal  $N$  of 24 and 14 motor units (PNR > 28 dB) were identified with the ultra-dense grid of 400  
435 electrodes for one participant at 30% and 50% MVC, respectively (Figure 9A), when 8 overlapping  
436 subsets of 64 electrodes were decomposed separately. These numbers of units are consistent with the  
437 40x40 mm size of the ultra-dense grid and the results in Figure 5, considering that dry electrodes were  
438 used in the second experimental session. Moreover, also consistent with the previous findings, fewer  
439 units were identified when the electrode density decreased, with 19 and 4 motor units identified with a  
440 4- and 8-mm IED at 30% MVC, respectively, and with 9 and 5 motor units identified with a 4- and 8-  
441 mm IED at 50% MVC, respectively. Although  $N$  increased between a 4- and 2-mm IED, with five and  
442 four new motor units identified at 30% and 50% MVC respectively (red pulse trains in Figure 9B), the  
443 rate of increase of  $N$  with electrode density was lower than previously expected (Figure 9C). As  
444 previously observed, the correlation between adjacent MUAPs increased from  $\rho = 0.93$  with an 8-mm  
445 IED to  $\rho = 0.98$  with a 2-mm IED at 30% MVC, and from  $\rho = 0.87$  with an 8-mm IED to  $\rho = 0.94$  with  
446 a 2-mm IED at 50% MVC (Figure 9A). All the motor units identified with the 8-mm and 4-mm IED  
447 were also identified with the 4 mm and 2-mm IED grids, respectively. Finally, small motor units were  
448 identified when increasing the density from a 8- to 4-mm IED (blue vs black trains in Figure 9B), while  
449 most of the smallest units were identified with an IED of 2 mm (red trains in Figure 9B).

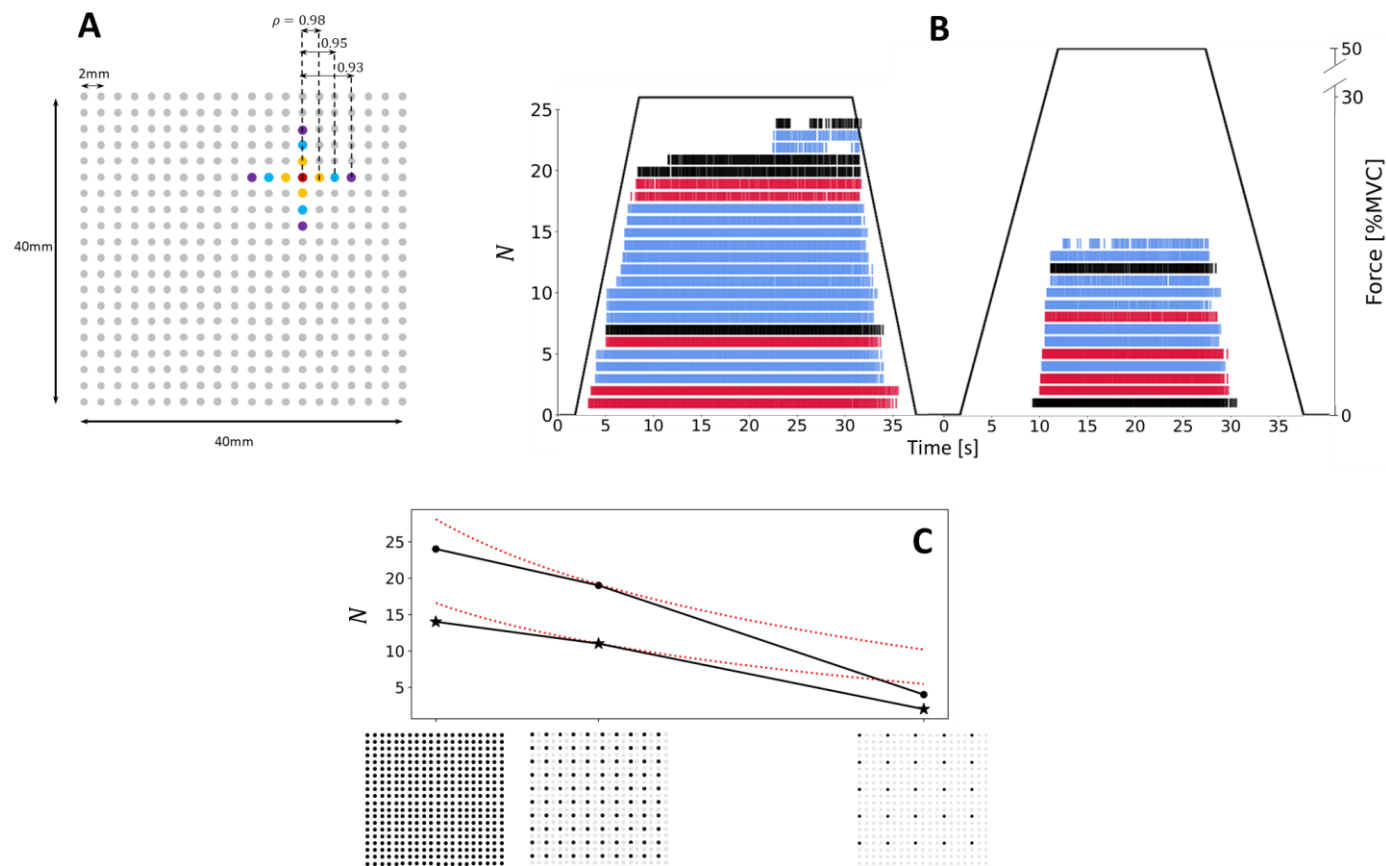

450

451 Figure 9: Results for the ultra-dense grid (2 mm IED, 40x40 mm, 400 electrodes). (A) Description of the ultra-dense grid (electrodes represented with grey circles). In average  
 452 across the 24 identified MUs, the correlation between the MUAPs at a 2 mm (orange), 4 mm (blue), and 8 mm (purple) IED and the MUAP with the highest peak-to-peak  
 453 amplitude (red) reached  $\rho = 0.98, 0.95,$  and  $0.93$  at 30% MVC, respectively, and  $0.94, 0.91,$  and  $0.87$  at 50% MVC, respectively. (B) Identified spike trains at 30% (left) and  
 454 50% MVC (right). The dark spike trains were identified with an 8 mm IED, the blue trains were additionally identified with the 4 mm IED, and the red trains were identified  
 455 with 2 mm IED. All the spike trains identified with one grid were also identified with the denser grids. (C) Effect of electrode density on the number of identified motor units  
 456 at 30% (dots) and 50% MVC (stars). The trendlines from the density analysis in Figure 4B, D computed with the grids of 256 electrodes are also reported (red dotted lines).

457 To maintain consistency with the previous computational and laboratory results, the grid was decomposed as eight partially overlapping subsets of 64 electrodes, as  
 458 explained in the Methods, to investigate the maximum number of identifiable motor units in this configuration.

## 459 Discussion

460 This study systematically investigated how the design of surface grids of EMG electrodes (grid size and  
461 electrode density) impacts the number and the size of the motor units identified with HD-EMG  
462 decomposition. Using a combination of computational and experimental approaches, we found that  
463 larger and denser grids of electrodes than conventionally used reveal a larger sample of motor units. As  
464 those units not identifiable with less dense and smaller grids mostly have a low recruitment threshold,  
465 we conclude that denser grids allow the identification of smaller motor units. This is possible because  
466 of a better spatial sampling of the MUAP distribution over the skin surface that resulted in a better  
467 discrimination among action potentials of different motor units. These results clarify the directions for  
468 designing new surface grids of electrodes that could span across the entire surface of the muscle of  
469 interest while keeping a high density of electrodes, with IED as low as 2-4 mm. Identifying large sets of  
470 small and large motor units is relevant in many research areas related to motor control, such as the  
471 investigation of neural synergies (Hug et al., 2022), neuromuscular modelling (Caillet et al., 2022c), or  
472 human-machine interfacing (Farina et al., 2021).

473

474 The number  $N$  of identified motor units increased across participants with the density of electrodes  
475 (Figure 4; Figure 8C), the size of the grid (Figure 5), and the number of electrodes (Figure 6). On  
476 average, 30 and 19 motor units were identified with the ‘conventional’ 64-electrode grid (8-mm IED,  
477 32 cm<sup>2</sup> surface area) at 30% and 50% MVC, respectively, which is consistent with several previous  
478 studies using similar grid designs (Del Vecchio et al., 2020). By increasing the density of electrodes and  
479 size of the grid to arrive to 256 electrodes separated by a 4 mm IED, we identified on average 56 and 45  
480 motor units at 30% and 50% MVC, respectively. We even reached 79 and 59 motor units for one subject  
481 (Figure 3), which is substantially more than the numbers of units usually reported in the HD-EMG  
482 literature, and twice those obtained with grids of 64 electrodes in this study. Our computational and  
483 experimental results showed that the size of the grid is a key factor contributing to the higher number of  
484 identified motor units (Figure 2B; Figure 5). According to our simulations, increasing the size of the  
485 grid increases the number of identifiable motor units, i.e., the number of motor units with unique sets of  
486 MUAPs across electrodes (Figure 2B). We concluded from the simulation that the differences between  
487 MUAPs result from the anatomical and physiological differences between adjacent motor units, such as  
488 the length of their fibres, the spread of the end plates, or their conduction velocity, as well as from the  
489 differences in the tissues interposed between the fibres and each recording electrode (Farina et al., 2004).  
490 Larger grids better sample these differences across electrodes, revealing the unique shapes of each motor  
491 unit (Farina et al., 2008). The density of electrodes was also found to be a critical factor contributing to  
492 increasing the number of identified motor units (Figure 4; Figure 9C). Dense grids especially contribute  
493 to identifying the small motor units (Figure 7B; Figure 9B), defined in this study according to their



494 recruitment threshold (Figure 7A) (Henneman and Mendell, 1981; Caillet et al., 2022b). Classically, the  
495 decomposition algorithms tend to converge towards the large and superficial motor units that contribute  
496 to most of the energy of the EMG signals (Farina and Holobar, 2016). Conversely, action potentials of  
497 the smallest motor units tend to have lower energy and are masked by the potentials of the larger units.  
498 These factors explain the lowest representation of small low-threshold motor units in available HD-  
499 EMG datasets (Caillet et al., 2022a). Increasing the density of electrodes would therefore enable to better  
500 sample the action potentials of these small motor units across multiple electrodes, enabling their  
501 identification. We however observed that increasing the electrode density did not reveal small motor  
502 units anymore during high-force muscle contractions (Figure 7D), potentially because of the large energy  
503 of the recorded MUAPs from the large motor units recruited between 30% and 50% MVC. We also  
504 showed in one subject that computationally increasing the density of electrodes by spatially resampling  
505 the experimental EMG signals (Supplementary Material B) did not reveal any previously hidden motor  
506 units.

507

508 The number of identified motor units  $N$  monotonically increased with the density of electrodes (Figure  
509 4BD), the size of the grid (Figure 5BD) and the number of electrodes (Figure 6), following significant  
510 logarithmic trendlines. Remarkably, very similar logarithmic tendencies were obtained at both 30% and  
511 50% MVC in all the analyses. Altogether, these trendlines suggested that the normalized number of  
512 identified motor units  $\bar{N}$  would grow with an electrode density beyond a 4-mm IED, before reaching a  
513 plateau for IEDs of 1-2 mm. We experimentally tested this hypothesis by designing a new grid of 400  
514 dry electrodes separated by an IED of 2 mm. While more motor units were identified at 2 mm than 4  
515 mm IED, as expected, the rate of increase between 4-mm and 2-mm IED was lower than predicted by  
516 the trendlines (Figure 9C). We explained this result by demonstrating that the level of correlation  
517 between MUAPs identified over adjacent electrodes, which was  $>0.95$  at both contraction levels with 4-  
518 mm IED (Figure 8), tended to 1 with further increasing electrode density (Figure 9A). Therefore, the  
519 high level of information shared between adjacent electrodes in ultra-dense grids (IED  $< 2$  mm) limits  
520 the percentage of identifiable motor units (Farina and Holobar, 2016). According to these results, we  
521 consider that optimal designs of surface grids of electrodes for identifying individual motor units would  
522 involve a surface that cover the muscle of interest with an IED of 2 to 4 mm, depending on the size of  
523 the muscle. It cannot be excluded, however, that the high correlation between adjacent electrodes with  
524 a 2-mm IED was partly due to the grid design and can be improved by reducing the electric crosstalk  
525 between electrodes, e.g., by reducing the electrode area.

526

527 Another important factor for the identification of individual motor units is the quality of the identified  
528 pulse trains, estimated by the PNR (Holobar et al., 2014) or the silhouette value. In this study, we showed



529 that the quality of the identified motor units (i.e., decomposition accuracy) increased when increasing  
530 the density of electrodes or the size of the grid, with PNR reaching on average 37-38 dB across  
531 participants with the grid of 256 electrodes (Supplementary Material C). A greater average PNR implies  
532 the need of less manual editing following the automatic decomposition (Hug et al., 2021b). The better  
533 spike train estimate depends on the better signal to noise ratio following the inversion of the mixing  
534 matrix since the pulse train of each motor unit is computed by projecting the extended, whitened signals  
535 on the separation vector (Holobar and Farina, 2014; Farina and Holobar, 2016; Negro et al., 2016).  
536 Likewise, the PNR substantially increased after we computationally increased the number of electrodes  
537 by spatially resampling the EMG signals. This practical result is of interest for most of the physiological  
538 studies that require a lengthy processing time to visually check and manually correct the pulse trains of  
539 all the motor units (Hug et al., 2021b).

540 Finally, by independently decomposing subsets of 64 electrodes, we increased both the total number and  
541 the percentage of small motor units identified from highly populated grids of 256 electrodes, compared  
542 to the simultaneous decomposition of all available observations (Figure 7B, C). This was likely due to  
543 the lower ratio of large motor units sampled by each subset of electrodes, allowing the algorithm to  
544 converge to smaller motor units that contributed to the signal (Figure 7B, C). According to  
545 Supplementary Material A, the plateauing behaviour previously observed in Figure 4 to Figure 6 is  
546 expected to be more pronounced when all the available signals are simultaneously decomposed. It  
547 should however be noted that the simulation results were obtained independently of a specific  
548 decomposition algorithm, as previously proposed by Farina et al (2008). On the other hand, the  
549 experimental results are based on a specific algorithm. Interestingly, however, the simulation and  
550 laboratory results were fully consistent and in agreement, indicating that the difference in shape of the  
551 spatially sampled MUAPs is the main factor influencing EMG decomposition.

552

### 553 Conclusion

554 By increasing the density and the number of electrodes, and the size of the grids, we increased the  
555 number of identifiable and experimentally identified motor units. The identified motor units had pulse  
556 trains with high PNR, limiting the manual processing time. Moreover, we identified a higher percentage  
557 of small motor units, which are classically filtered out with the current conventional grid designs. In this  
558 way, a maximum of 79 motor units (PNR > 28 dB; mean: 36 dB), including 40% of small motor units,  
559 were identified, which is a substantially greater sample than previously shown with smaller and less  
560 dense grids. From these results, we encourage researchers to develop and apply larger and denser EMG  
561 grids to cover the full muscle of interest with IEDs as small as 2 mm. This approach increases the sample  
562 of motor units that can be experimentally investigated with non-invasive techniques.

563 References:

- 564 Caillet AH, Phillips ATM, Farina D, Modenese L (2022a) Estimation of the firing behaviour of a  
565 complete motoneuron pool by combining electromyography signal decomposition and  
566 realistic motoneuron modelling. *PLoS Comput Biol* 18:e1010556.
- 567 Caillet AH, Phillips ATM, Farina D, Modenese L (2022b) Mathematical relationships between spinal  
568 motoneuron properties. *Elife* 11.
- 569 Caillet AH, Phillips ATM, Carty CP, Farina D, Modenese L (2022c) Hill-type computational models of  
570 muscle-tendon actuators: a systematic review. *bioRxiv:2022.2010.2014.512218*.
- 571 Churchland MM, Shenoy KV (2007) Temporal complexity and heterogeneity of single-neuron activity  
572 in premotor and motor cortex. *J Neurophysiol* 97:4235-4257.
- 573 Del Vecchio A, Negro F, Felici F, Farina D (2017) Associations between motor unit action potential  
574 parameters and surface EMG features. *J Appl Physiol* (1985) 123:835-843.
- 575 Del Vecchio A, Holobar A, Falla D, Felici F, Enoka RM, Farina D (2020) Tutorial: Analysis of motor unit  
576 discharge characteristics from high-density surface EMG signals. *J Electromyogr Kinesiol*  
577 53:102426.
- 578 Enoka RM (2019) Physiological validation of the decomposition of surface EMG signals. *J*  
579 *Electromyogr Kinesiol* 46:70-83.
- 580 Farina D, Holobar A (2016) Characterization of Human Motor Units From Surface EMG  
581 Decomposition. *Proceedings of the IEEE* 104:353-373.
- 582 Farina D, Merletti R, Enoka RM (2004) The extraction of neural strategies from the surface EMG. *J*  
583 *Appl Physiol* (1985) 96:1486-1495.
- 584 Farina D, Negro F, Gazzoni M, Enoka RM (2008) Detecting the unique representation of motor-unit  
585 action potentials in the surface electromyogram. *J Neurophysiol* 100:1223-1233.
- 586 Farina D, Negro F, Muceli S, Enoka RM (2016) Principles of Motor Unit Physiology Evolve With  
587 Advances in Technology. *Physiology (Bethesda)* 31:83-94.
- 588 Farina D, Vujaklija I, Brånemark R, Bull AMJ, Dietl H, Graimann B, Hargrove LJ, Hoffmann KP, Huang  
589 HH, Ingvarsson T, Janusson HB, Kristjánsson K, Kuiken T, Micera S, Stieglitz T, Sturma A, Tyler  
590 D, Weir RFF, Aszmann OC (2021) Toward higher-performance bionic limbs for wider clinical  
591 use. *Nat Biomed Eng*.
- 592 Gallego JA, Perich MG, Chowdhury RH, Solla SA, Miller LE (2020) Long-term stability of cortical  
593 population dynamics underlying consistent behavior. *Nat Neurosci* 23:260-270.
- 594 Heckman CJ, Enoka RM (2012) Motor unit. *Compr Physiol* 2:2629-2682.
- 595 Henneman E, Mendell LM (1981) Functional Organization of Motoneuron Pool and its Inputs. In:  
596 *Comprehensive Physiology*, pp 423-507.
- 597 Holobar A, Farina D (2014) Blind source identification from the multichannel surface  
598 electromyogram. *Physiol Meas* 35:R143-165.
- 599 Holobar A, Minetto MA, Farina D (2014) Accurate identification of motor unit discharge patterns  
600 from high-density surface EMG and validation with a novel signal-based performance metric.  
601 *J Neural Eng* 11:016008.
- 602 Hug F, Del Vecchio A, Avrillon S, Farina D, Tucker K (2021a) Muscles from the same muscle group do  
603 not necessarily share common drive: evidence from the human triceps surae. *J Appl Physiol*  
604 (1985) 130:342-354.
- 605 Hug F, Avrillon S, Sarcher A, Del Vecchio A, Farina D (2022) Correlation networks of spinal motor  
606 neurons that innervate lower limb muscles during a multi-joint isometric task. *J Physiol*.
- 607 Hug F, Avrillon S, Del Vecchio A, Casolo A, Ibanez J, Nuccio S, Rossato J, Holobar A, Farina D (2021b)  
608 Analysis of motor unit spike trains estimated from high-density surface electromyography is  
609 highly reliable across operators. *J Electromyogr Kinesiol* 58:102548.
- 610 Jun JJ et al. (2017) Fully integrated silicon probes for high-density recording of neural activity. *Nature*  
611 551:232-236.

- 612 Konstantin A, Yu T, Le Carpentier E, Aoustin Y, Farina D (2020) Simulation of Motor Unit Action  
613 Potential Recordings From Intramuscular Multichannel Scanning Electrodes. IEEE  
614 Transactions on Biomedical Engineering 67:2005-2014.
- 615 Muceli S, Poppendieck W, Holobar A, Gandevia S, Liebetanz D, Farina D (2022) Blind identification of  
616 the spinal cord output in humans with high-density electrode arrays implanted in muscles.  
617 Science advances 8:eabo5040.
- 618 Muceli S, Poppendieck W, Negro F, Yoshida K, Hoffmann KP, Butler JE, Gandevia SC, Farina D (2015)  
619 Accurate and representative decoding of the neural drive to muscles in humans with multi-  
620 channel intramuscular thin-film electrodes. J Physiol 593:3789-3804.
- 621 Negro F, Muceli S, Castronovo AM, Holobar A, Farina D (2016) Multi-channel intramuscular and  
622 surface EMG decomposition by convolutive blind source separation. J Neural Eng 13:026027.
- 623 Steinmetz NA, Koch C, Harris KD, Carandini M (2018) Challenges and opportunities for large-scale  
624 electrophysiology with Neuropixels probes. Curr Opin Neurobiol 50:92-100.
- 625 Stringer C, Pachitariu M, Steinmetz N, Reddy CB, Carandini M, Harris KD (2019) Spontaneous  
626 behaviors drive multidimensional, brainwide activity. Science 364:255.
- 627
